# Supplementary material for: BAMBI: A new method for automated assessment of bidirectional early-life interaction between maternal behavior and pup vocalization in mouse dam-pup dyads
Source: Frontiers journal article supplement (doi:10.3389/fnbeh.2023.1139254), 2023-03-03

## *Supplementary Material*

### **Automated assessment of bidirectional early-life interaction in mouse dam-pup dyads**

**C. Winters<sup>1,4</sup>, W. Gorssen<sup>2</sup>, M. Wöhr<sup>3,4,5,6</sup> & R. D'Hooze<sup>1,4</sup>**

<sup>1</sup> Laboratory for Biological Psychology, KU Leuven, Tiensestraat 102 – PO Box 3714, 3000, Leuven, Belgium

<sup>2</sup> Department of Biosystems, Center for Animal Breeding and Genetics, KU Leuven, Leuven, Belgium

<sup>3</sup> KU Leuven, Faculty of Psychology and Educational Sciences, Research Unit Brain and Cognition, Laboratory of Biological Psychology, Social and Affective Neuroscience Research Group, Leuven B-3000, Belgium

<sup>4</sup> KU Leuven, Leuven Brain Institute, Leuven B-3000, Belgium

<sup>5</sup> Behavioral Neuroscience, Experimental and Biological Psychology, Faculty of Psychology, Philipps-University Marburg, 35032 Marburg, Germany.

<sup>6</sup> Center for Mind, Brain and Behavior, Philipps-University Marburg, 35032 Marburg, Germany.

**\* Correspondence:**

Corresponding Author

carmen.winters@kuleuven.be

## 1 Supplementary Data

**Supplementary File 1.** Structural parameters used to train the DAS automated detection network.

```
das.train.train(model_name='tcn_stft',  
                data_dir=path_to_data,  
                save_dir=path_to_data,  
                pre_nb_conv=4,  
                pre_nb_dft=33,  
                pre_nb_filters=33,  
                pre_kernel_size=64,  
                nb_hist=8192,  
                batch_size=32,  
                batch_norm=True,  
                kernel_size=16,  
                nb_filters=32,  
                ignore_boundaries=True,  
                verbose=1,  
                nb_conv=2,  
                learning_rate=0.0005,  
                use_separable=[True, True, False, False],  
                nb_epoch=100)
```

## 2 Supplementary Figures and Tables

### 2.1 Supplementary Tables

**Supplementary Table 1.** Table including pups that did not vocalize.

|              | SEQUENCE     | RETRIEVED | NOT RETRIEVED |
|--------------|--------------|-----------|---------------|
| <b>PND5</b>  |              | 31        | 2             |
|              | <i>Pup 1</i> | 1         | 1             |
|              | <i>Pup 2</i> | 4         | 0             |
|              | <i>Pup 3</i> | 6         | 0             |
|              | <i>Pup 4</i> | 2         | 1             |
|              | <i>Pup 5</i> | 8         | 0             |
|              | <i>Pup 6</i> | 10        | 0             |
| <b>PND7</b>  |              | 4         | 0             |
|              | <i>Pup 1</i> | 1         | 0             |
|              | <i>Pup 2</i> | 1         | 0             |
|              | <i>Pup 3</i> | 1         | 0             |
|              | <i>Pup 4</i> | 1         | 0             |
| <b>PND9</b>  |              | 4         | 0             |
|              | <i>Pup 1</i> | 0         | 0             |
|              | <i>Pup 2</i> | 1         | 0             |
|              | <i>Pup 3</i> | 1         | 0             |
|              | <i>Pup 4</i> | 2         | 0             |
| <b>PND11</b> |              | 13        | 1             |
|              | <i>Pup 1</i> | 5         | 0             |

|              |              |   |   |
|--------------|--------------|---|---|
|              | <i>Pup 2</i> | 2 | 1 |
|              | <i>Pup 3</i> | 4 | 0 |
|              | <i>Pup 4</i> | 2 | 0 |
| <b>PND13</b> | 12           | 0 |   |
|              | <i>Pup 1</i> | 2 | 0 |
|              | <i>Pup 2</i> | 3 | 1 |
|              | <i>Pup 3</i> | 2 | 0 |
|              | <i>Pup 4</i> | 5 | 0 |

## 2.2 Supplementary Figures

**Supplementary Figure 1.** Pairwise correlational plots of total amount of emitted USVs (number USVs), USV rate (USVs/s), average USV duration (s) and latency to first USV (s). Pairwise correlation plots are first given for all test days combined (PND5-13) and then separately for PND5, 7, 9, 11 and 13. Below diagonal the pairwise correlation plot is shown. Above the diagonal the estimated Pearson correlation coefficient is given with significance value. (°p<0.10; \*p<0.05; \*\*p<0.01; \*\*\*p<0.001)

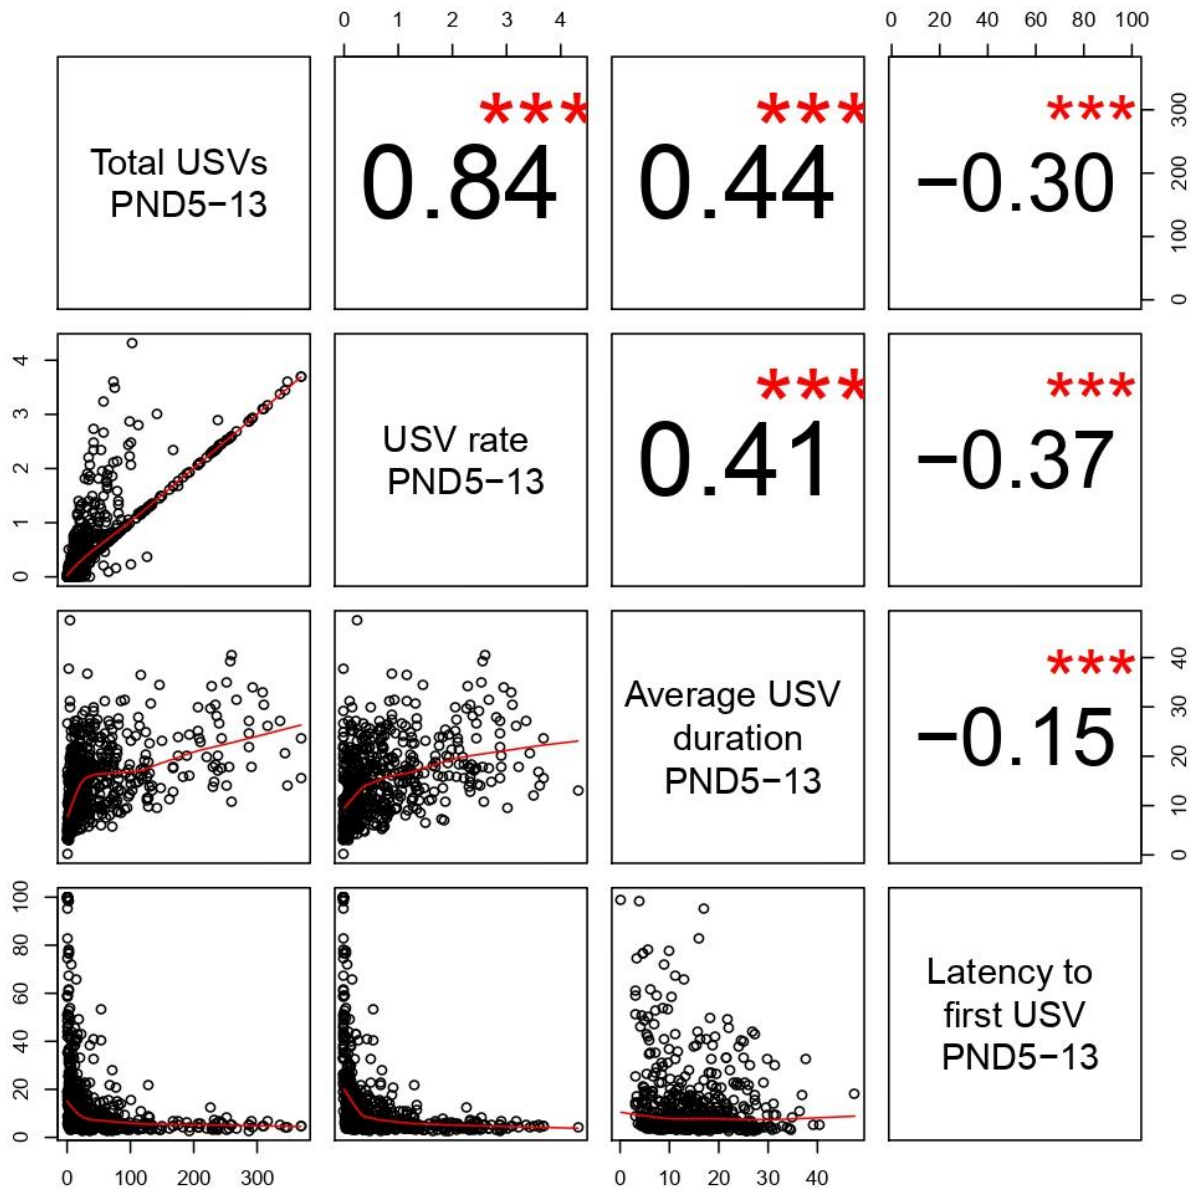

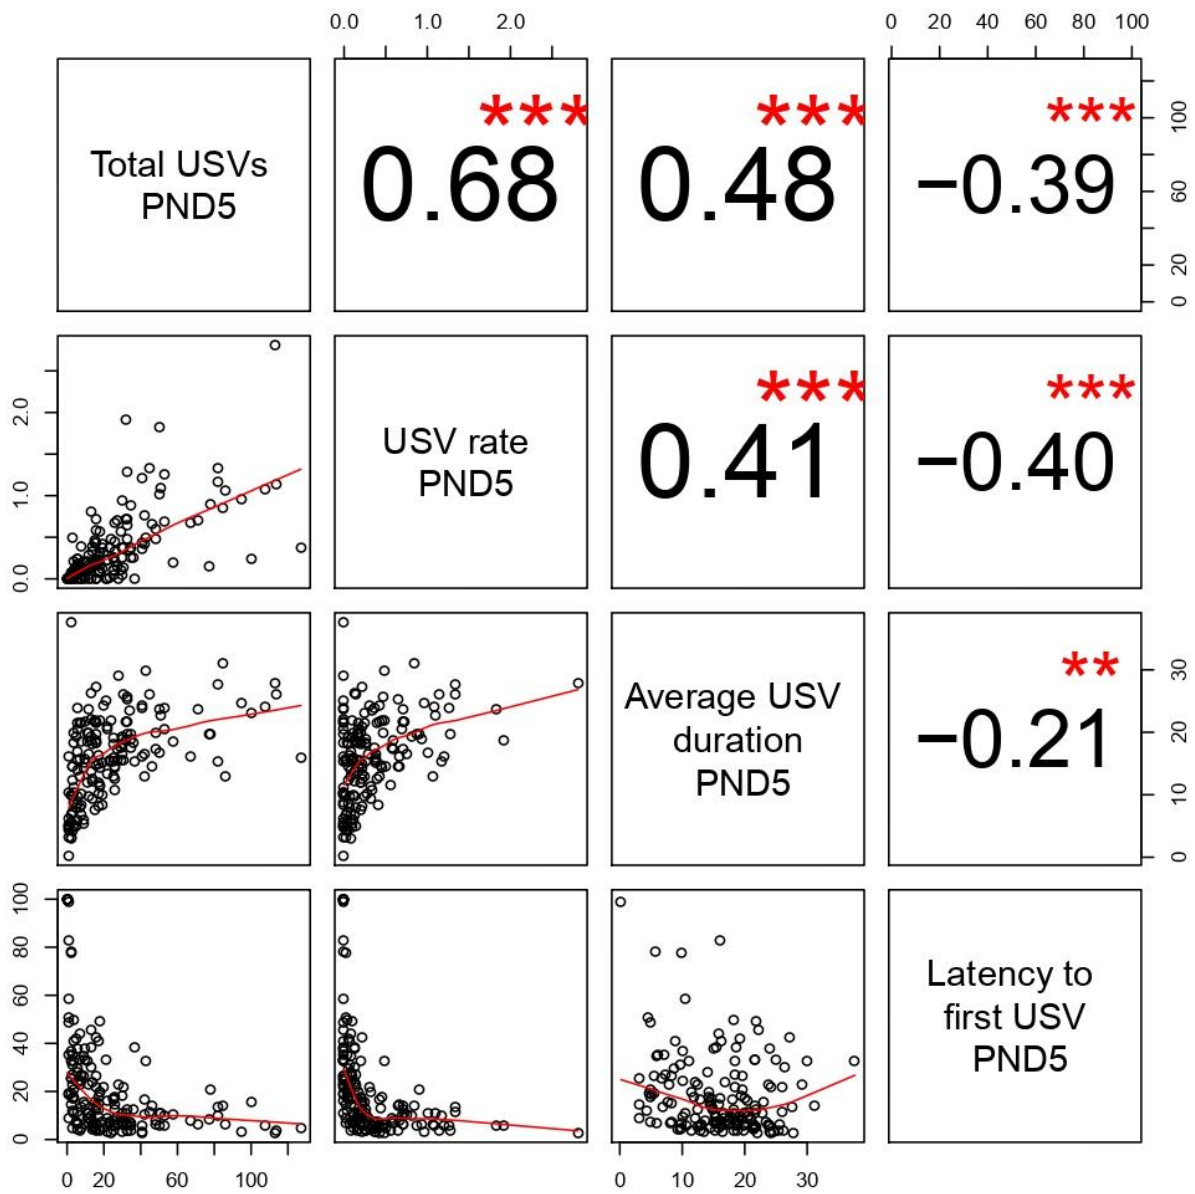

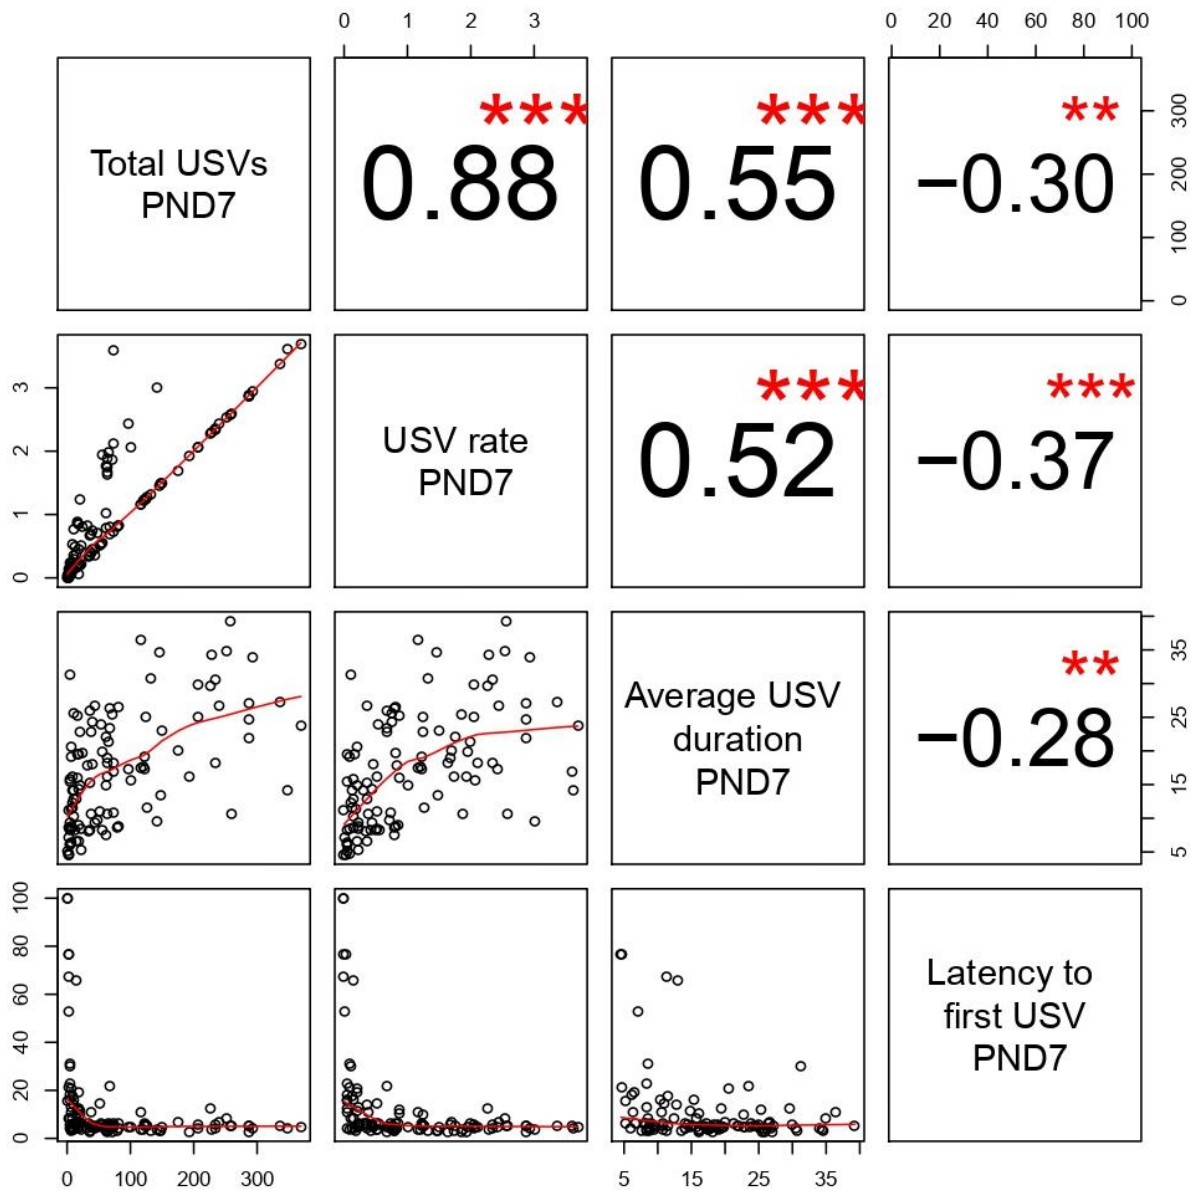

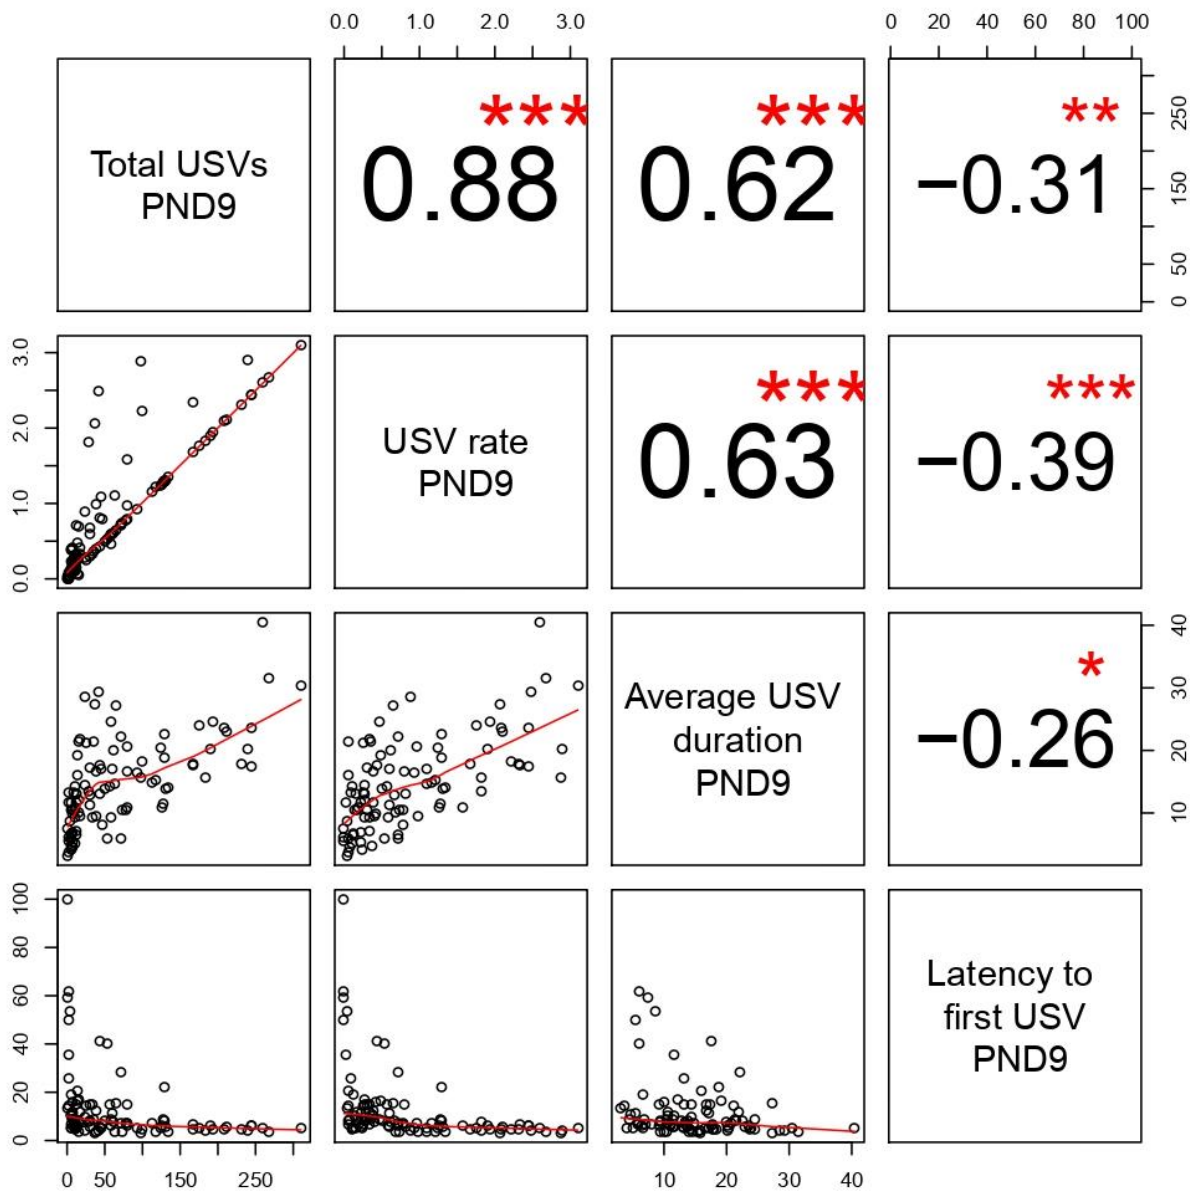



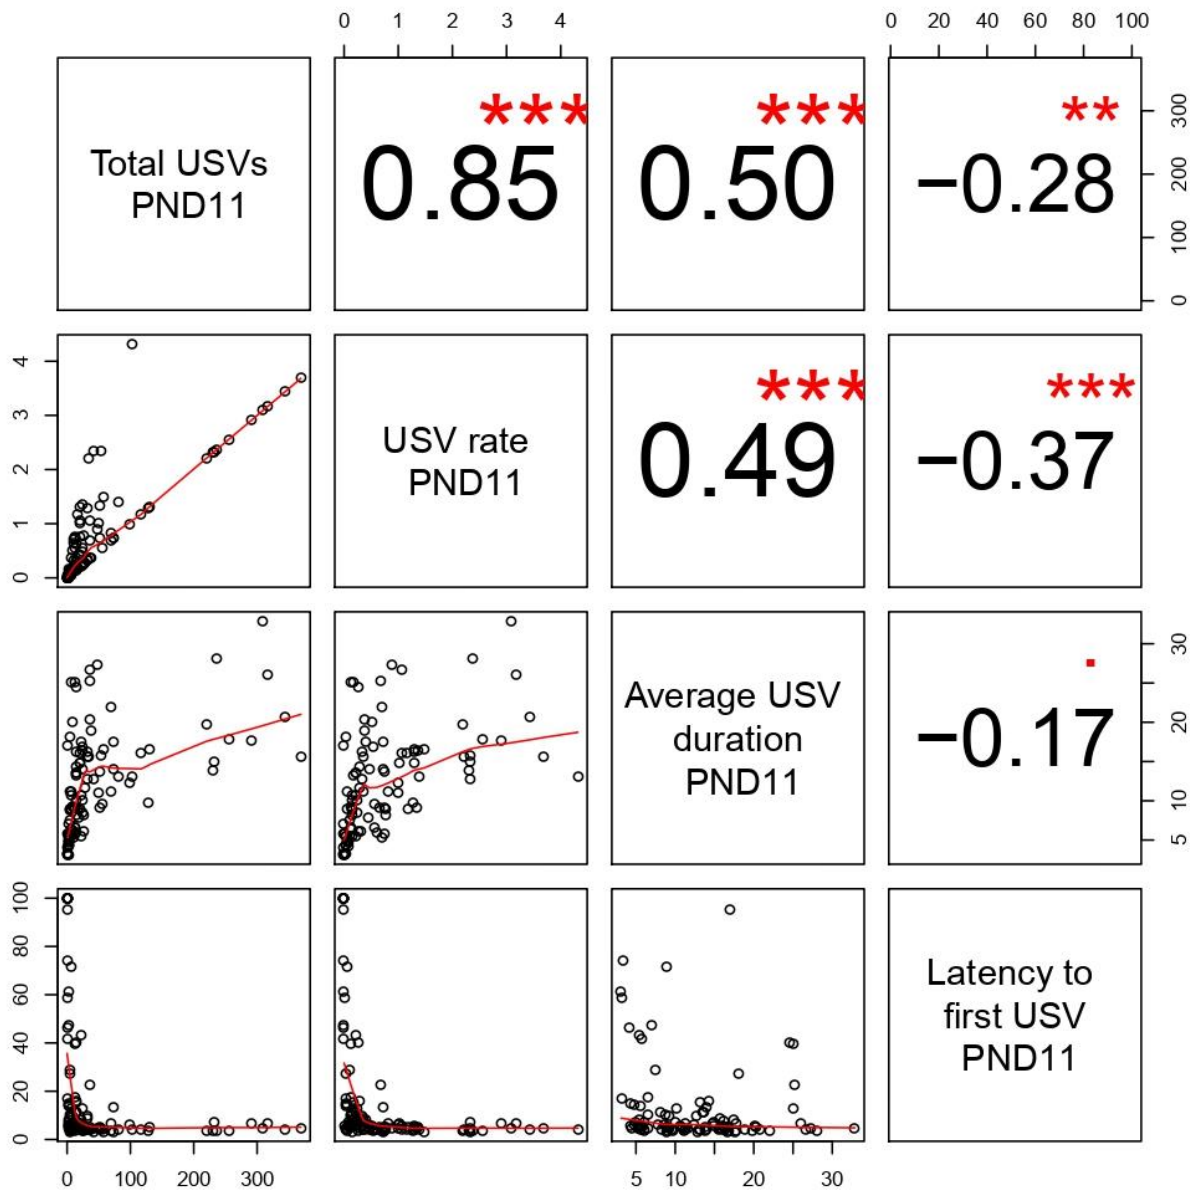

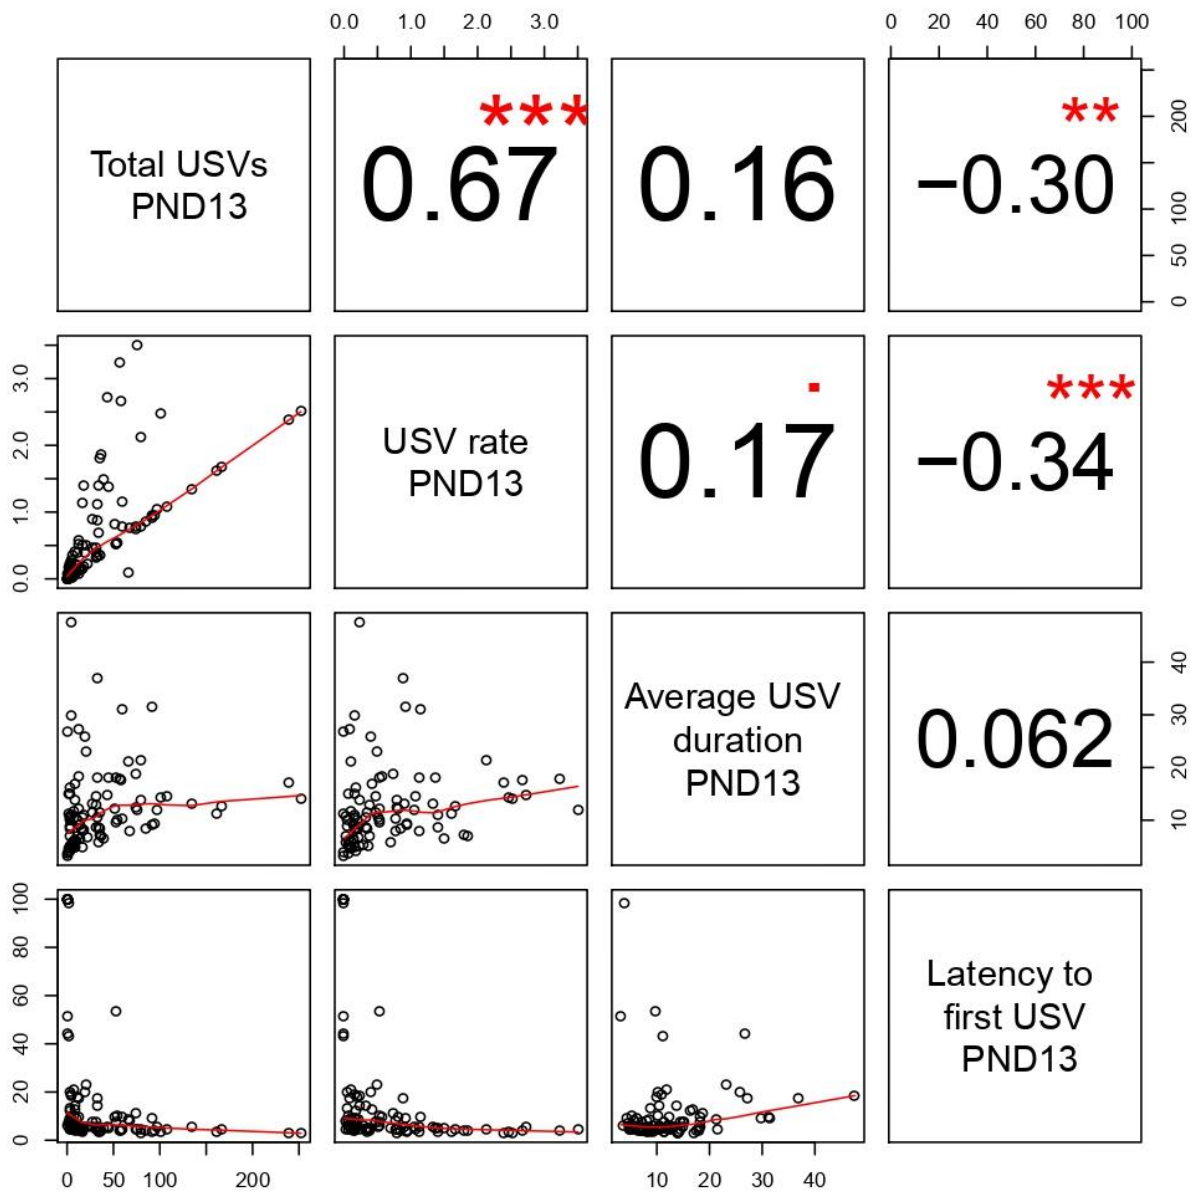

**Supplementary Figure 2.** Repeatability of maternal retrieval time represented as a pairwise correlational plot of retrieval time (s) over PND5, 7, 9, 11 and 13. Below diagonal the pairwise correlation plot is shown. Above the diagonal the estimated Pearson correlation coefficient is given with significance value. (°p<0.10; \*p<0.05; \*\*p<0.01; \*\*\*p<0.001)

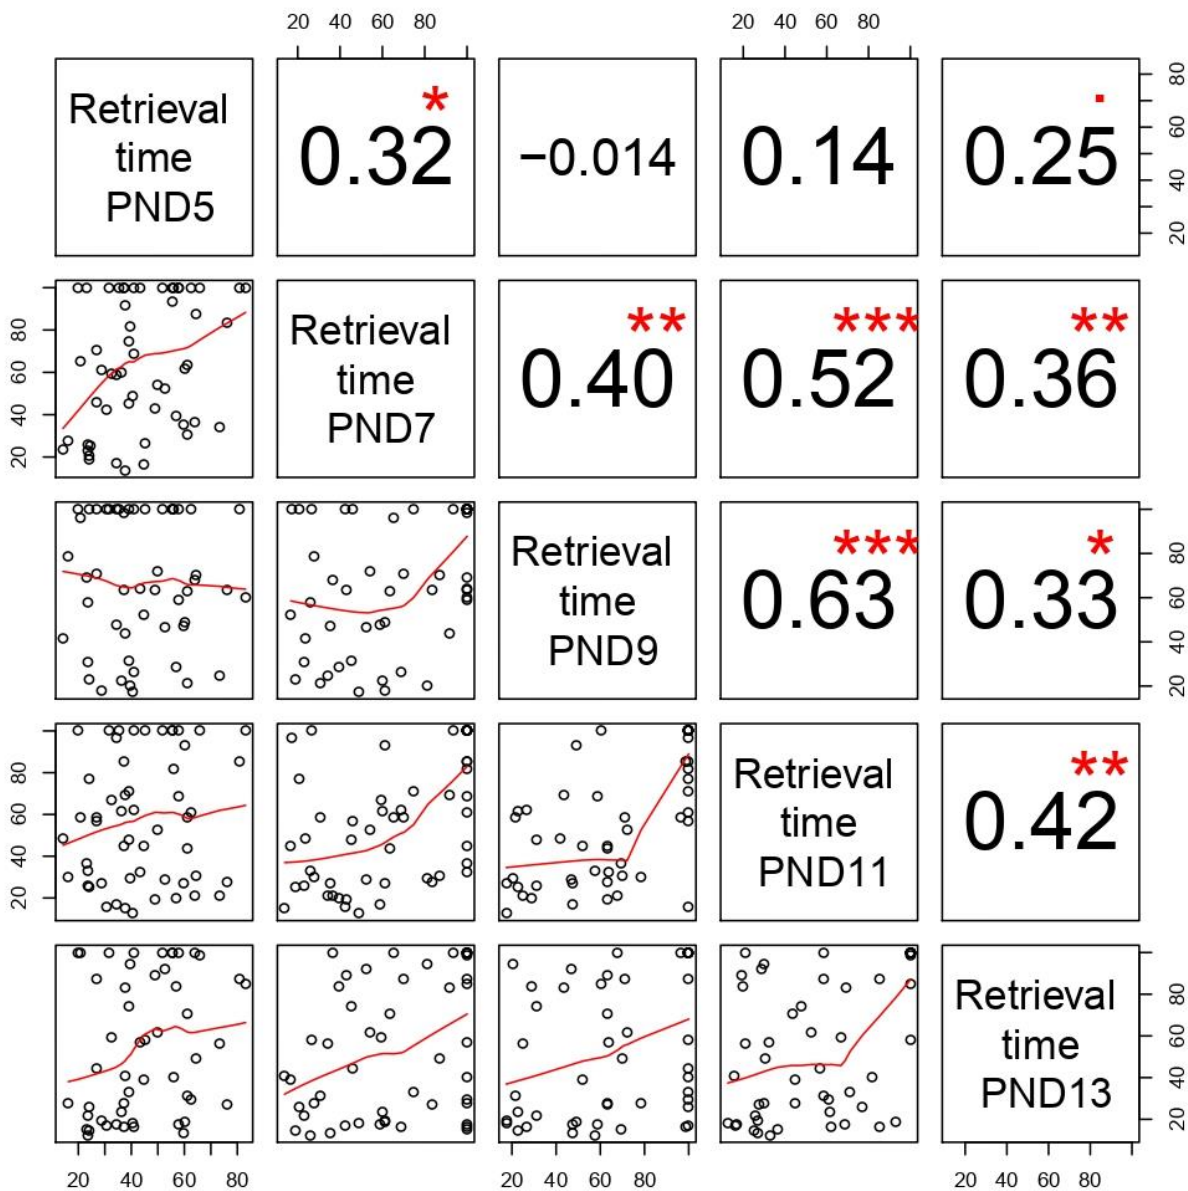

**Supplementary Figure 3.** Repeatability of USV rate represented as a pairwise correlational plot of USV rate (USVs/s) over PND5, 7, 9, 11 and 13. Below diagonal the pairwise correlation plot is shown. Above the diagonal the estimated Pearson correlation coefficient is given with significance value. (°p<0.10; \*p<0.05; \*\*p<0.01; \*\*\*p<0.001)

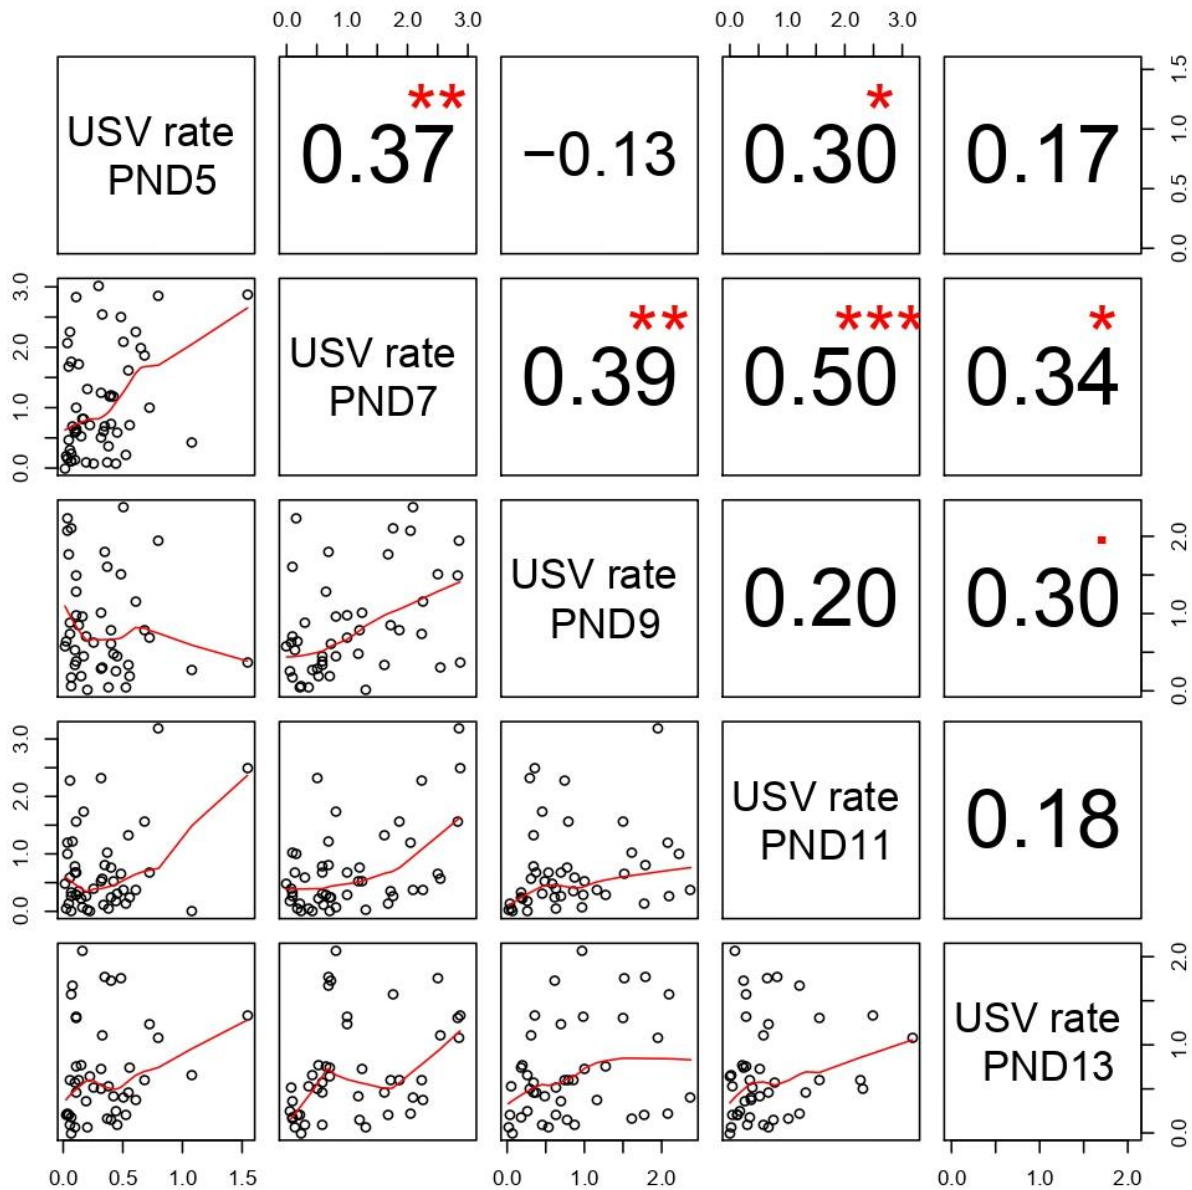

**Supplementary Figure 4.** Repeatability of average USV duration represented as a pairwise correlational plot of average USV duration (s) over PND5, 7, 9, 11 and 13. Below diagonal the pairwise correlation plot is shown. Above the diagonal the estimated Pearson correlation coefficient is given with significance value. (°p<0.10; \*p<0.05; \*\*p<0.01; \*\*\*p<0.001)

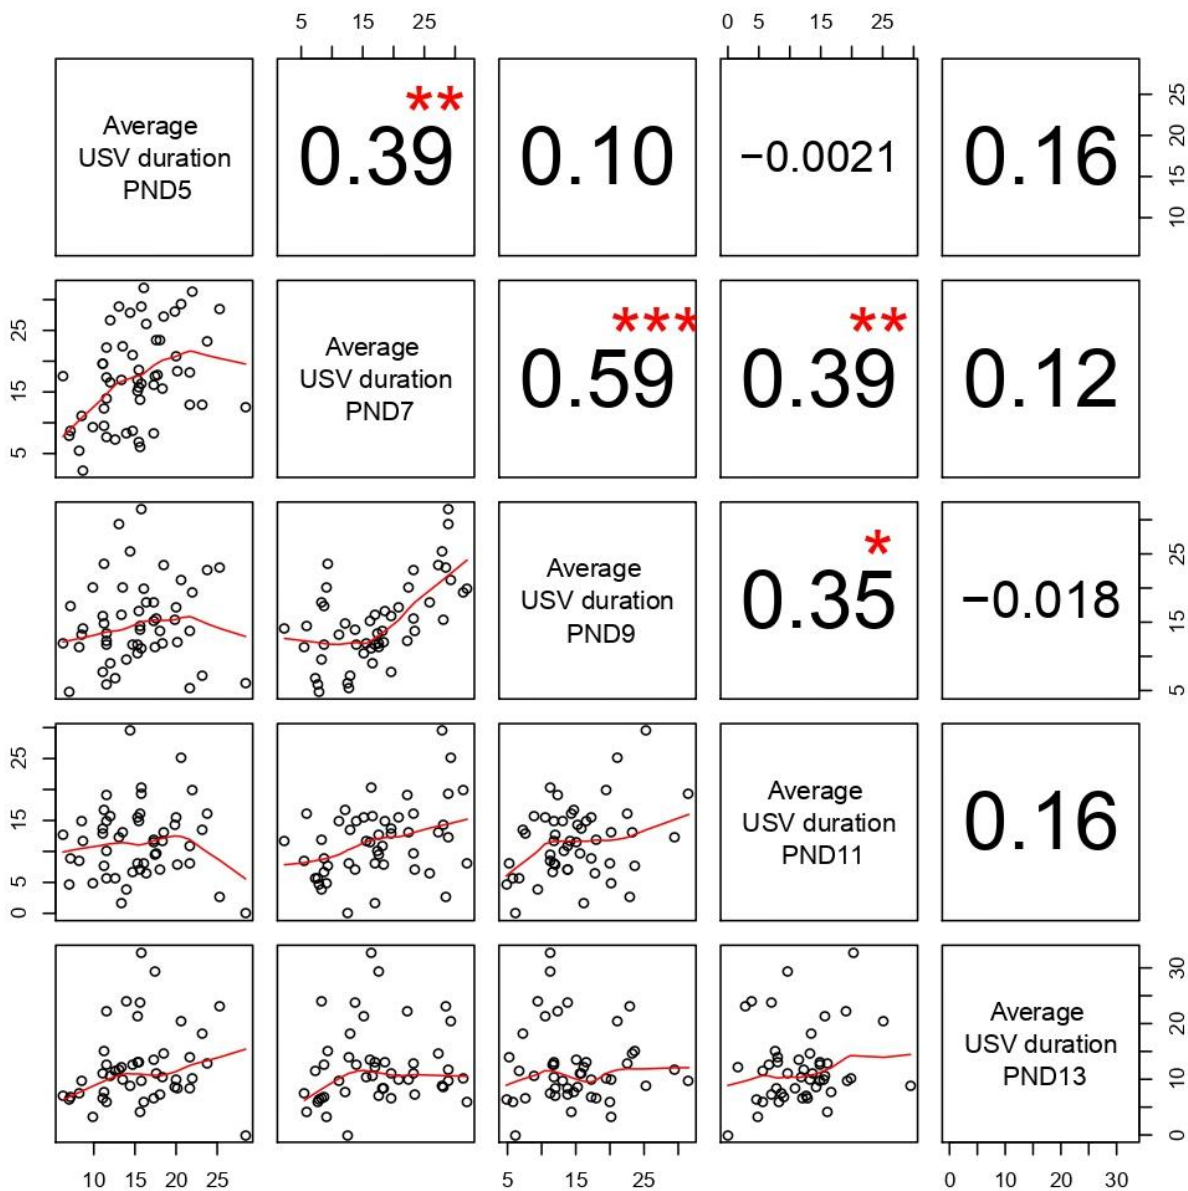

**Supplementary Figure 5.** Repeatability of latency to first USV represented as a pairwise correlational plot of latency to first USV (s) over PND5, 7, 9, 11 and 13. Below diagonal the pairwise correlation plot is shown. Above the diagonal the estimated Pearson correlation coefficient is given with significance value. ( $^{\circ}$ p<0.10; \*p<0.05; \*\*p<0.01; \*\*\*p<0.001)

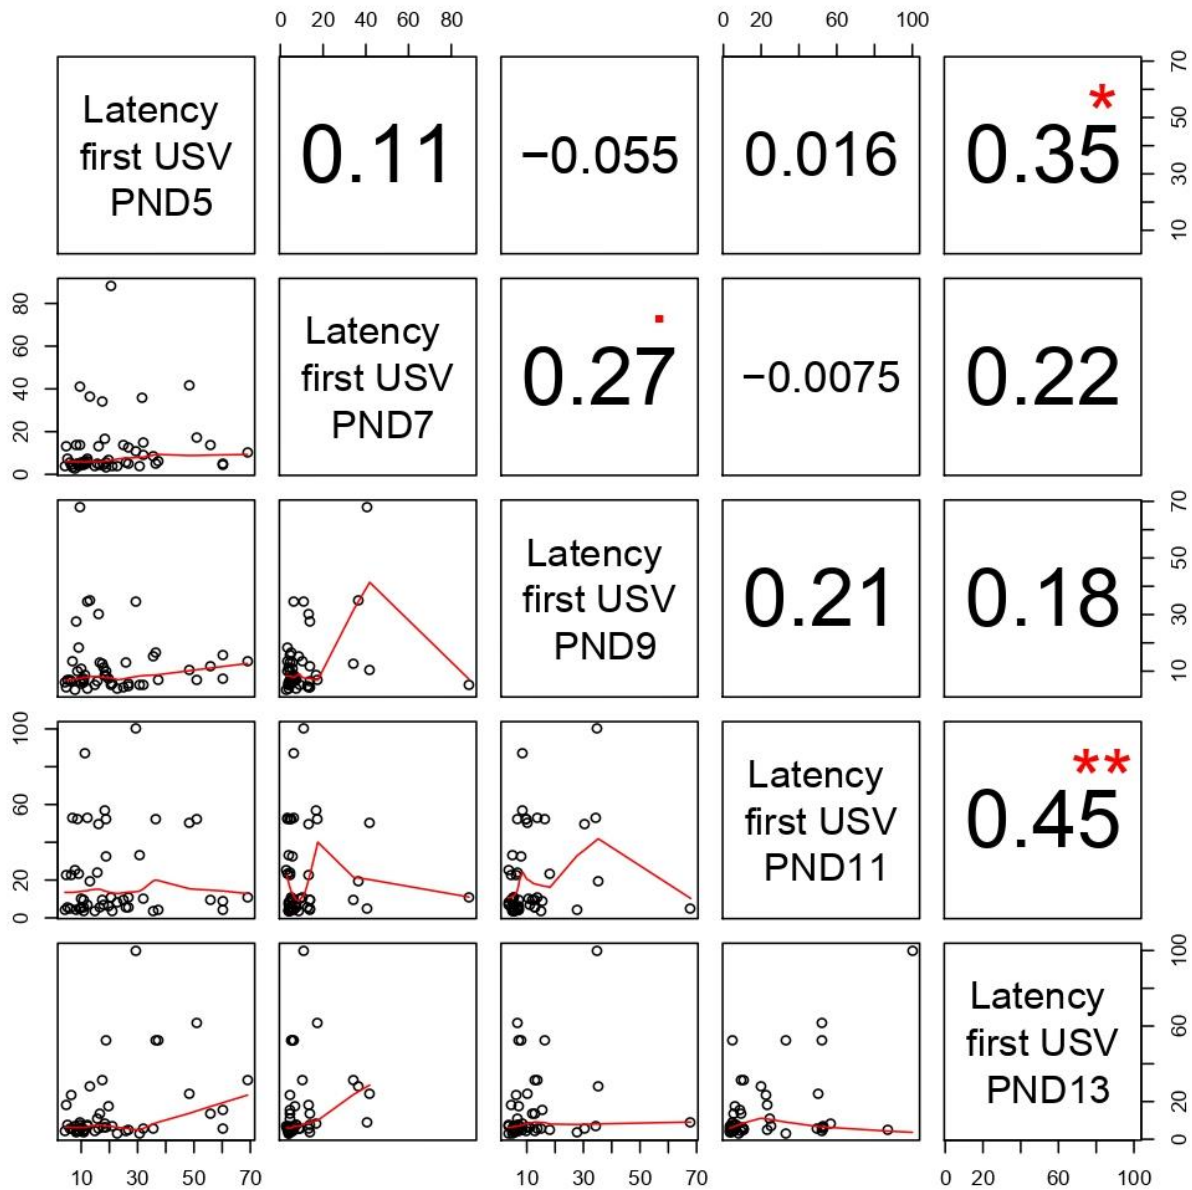



**Supplementary Figure 6.** Pairwise correlational plots of retrieval time (s), USVs emitted before retrieval (number USVs), USV rate (USVs/s) and USVs emitted in the first 10 seconds of PRT trial (number USVs). Pairwise correlation plots are first given for all test days combined (PND5-13) and then separately for PND5, 7, 9, 11 and 13. Below diagonal the pairwise correlation plot is shown. Above the diagonal the estimated Pearson correlation coefficient is given with significance value. ( $^{\circ}$ p<0.10; \*p<0.05; \*\*p<0.01; \*\*\*p<0.001)

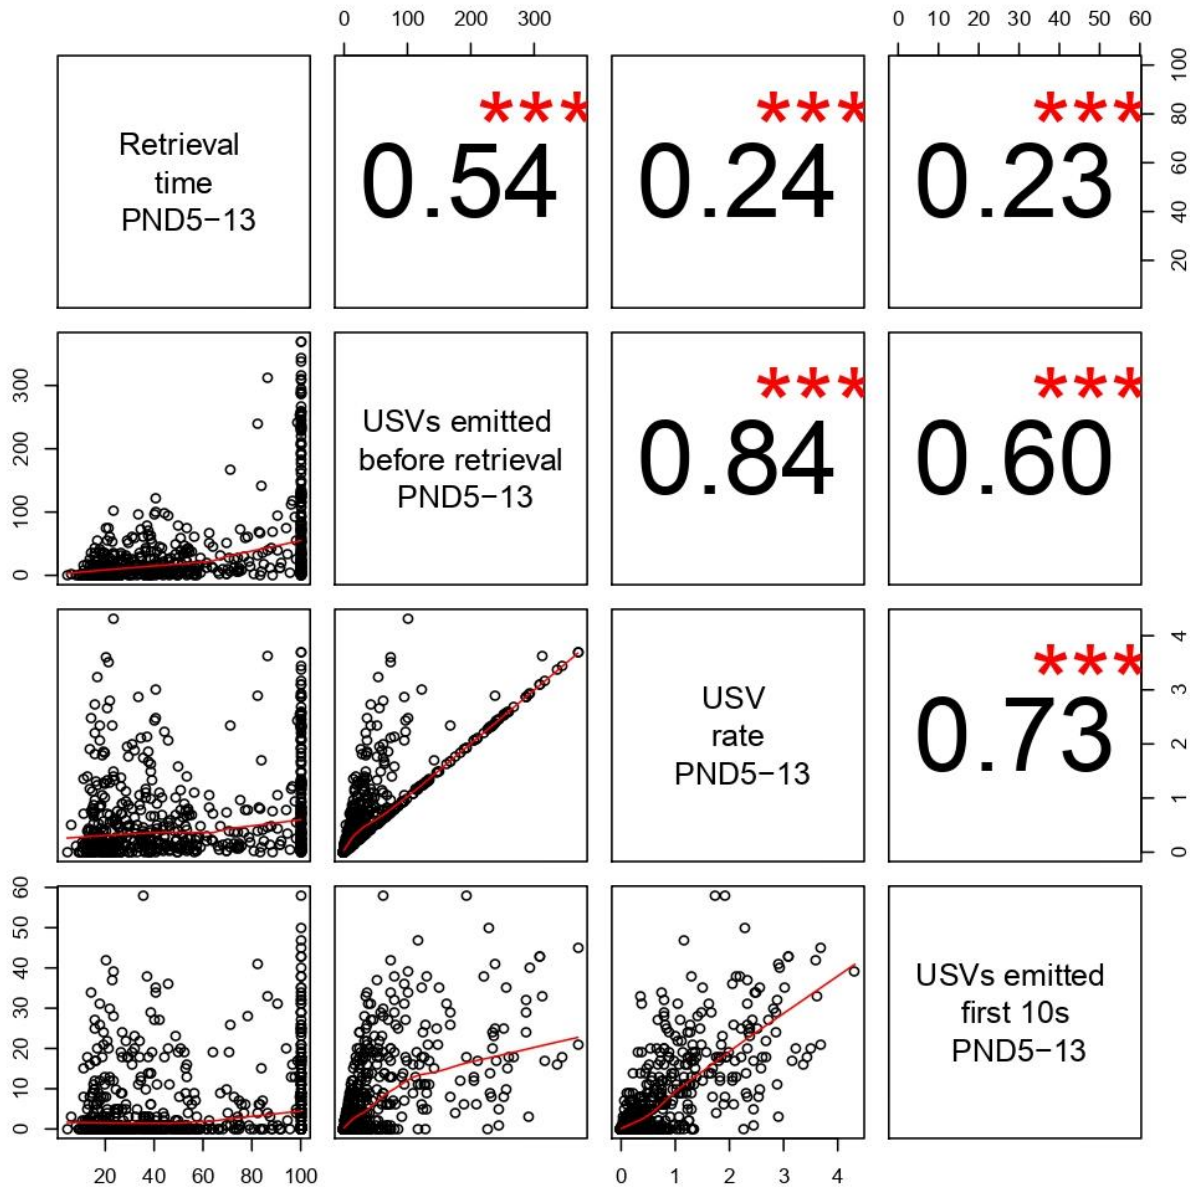

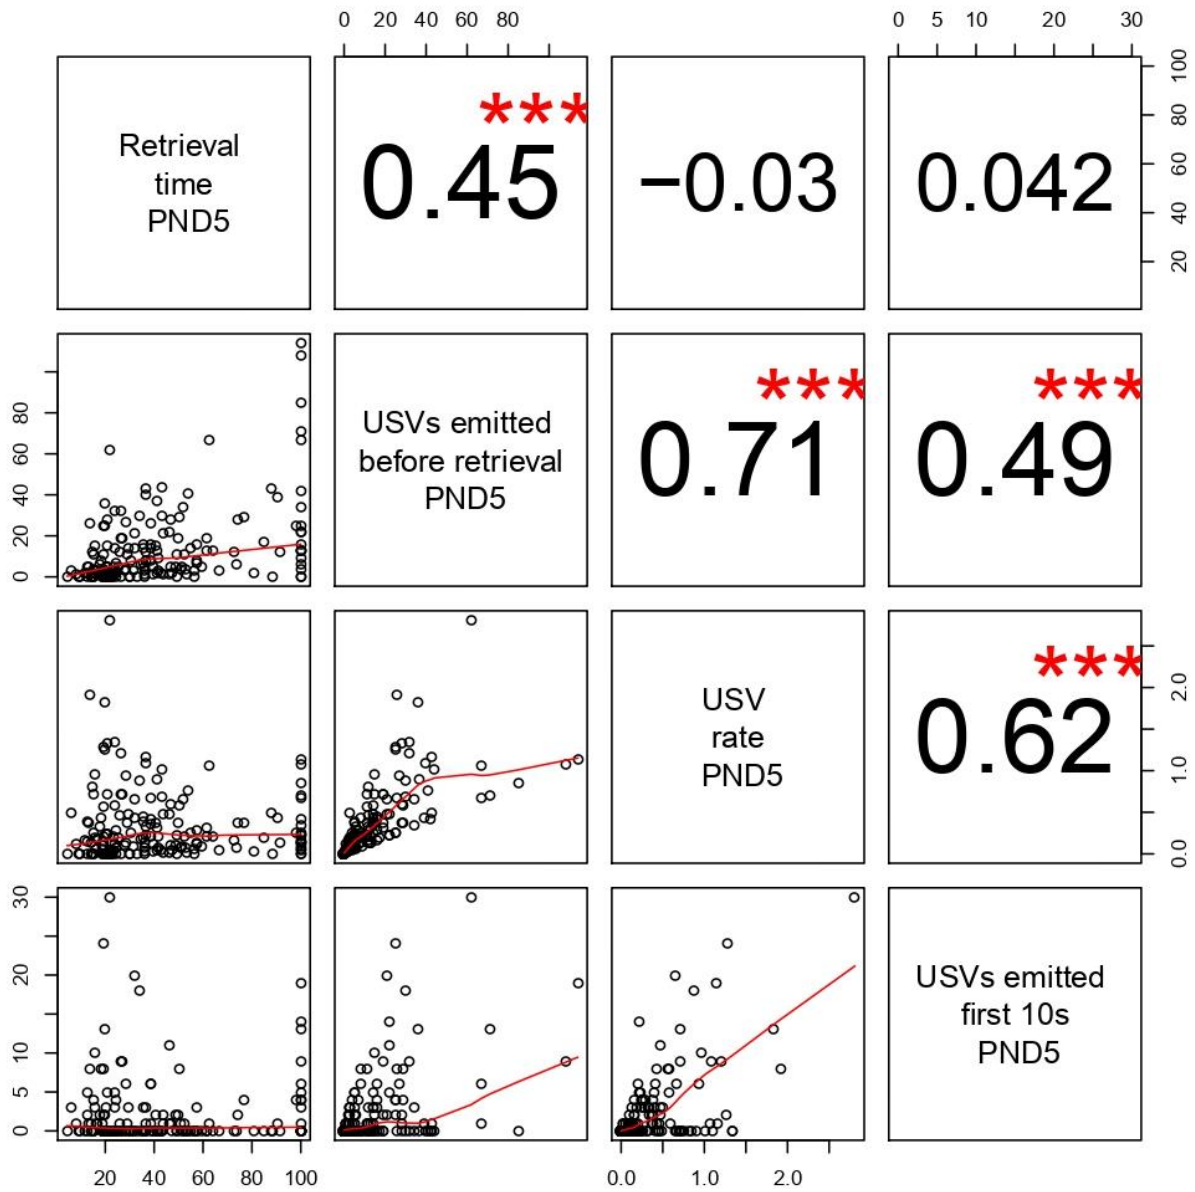



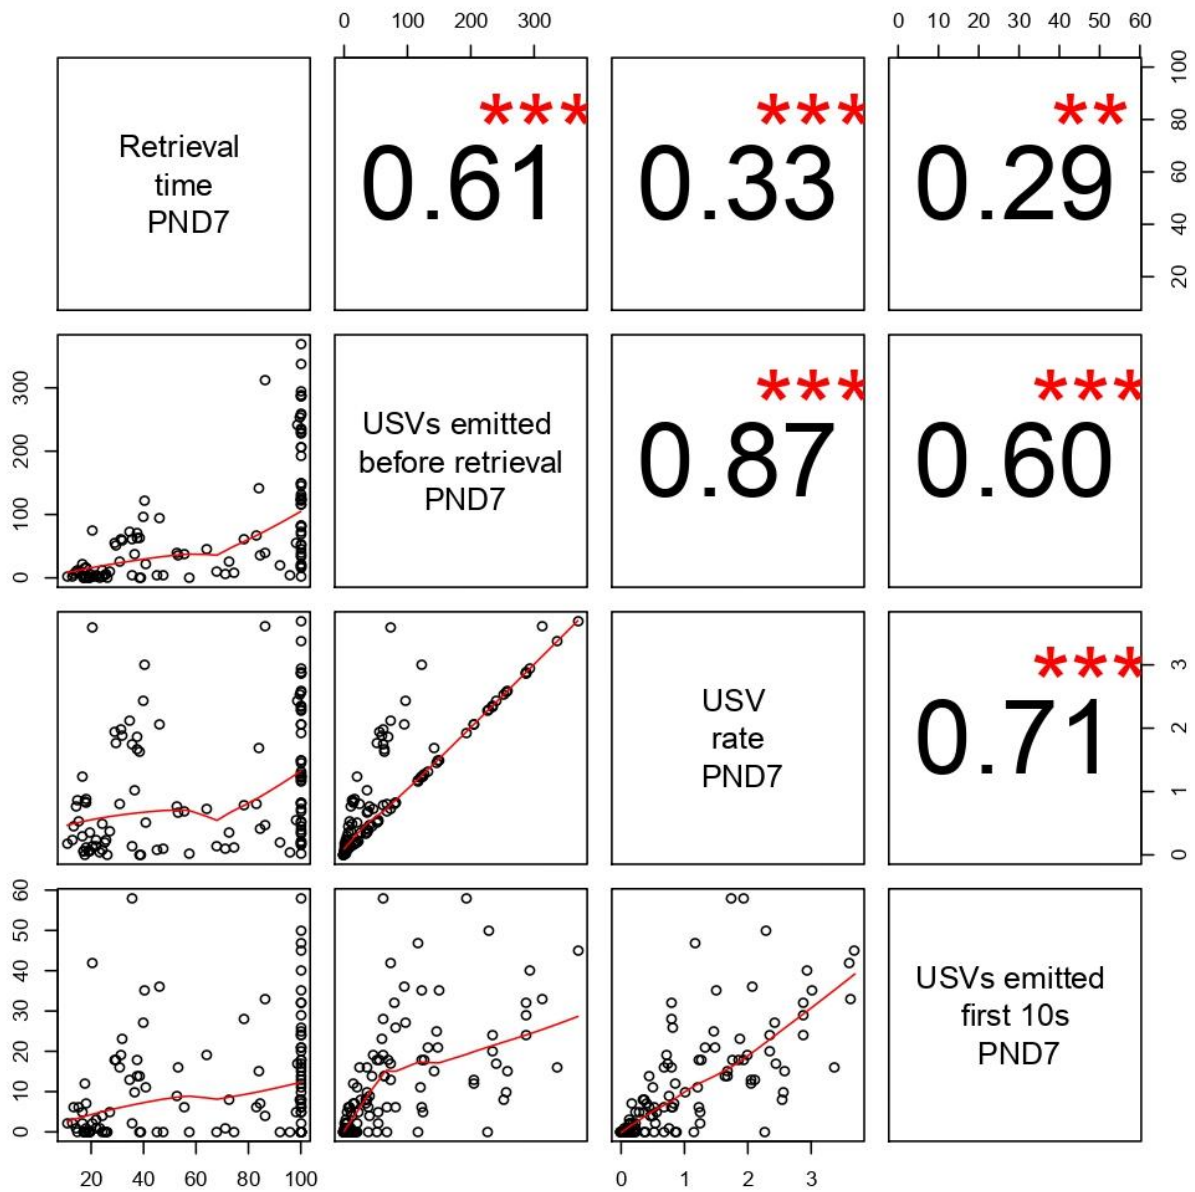

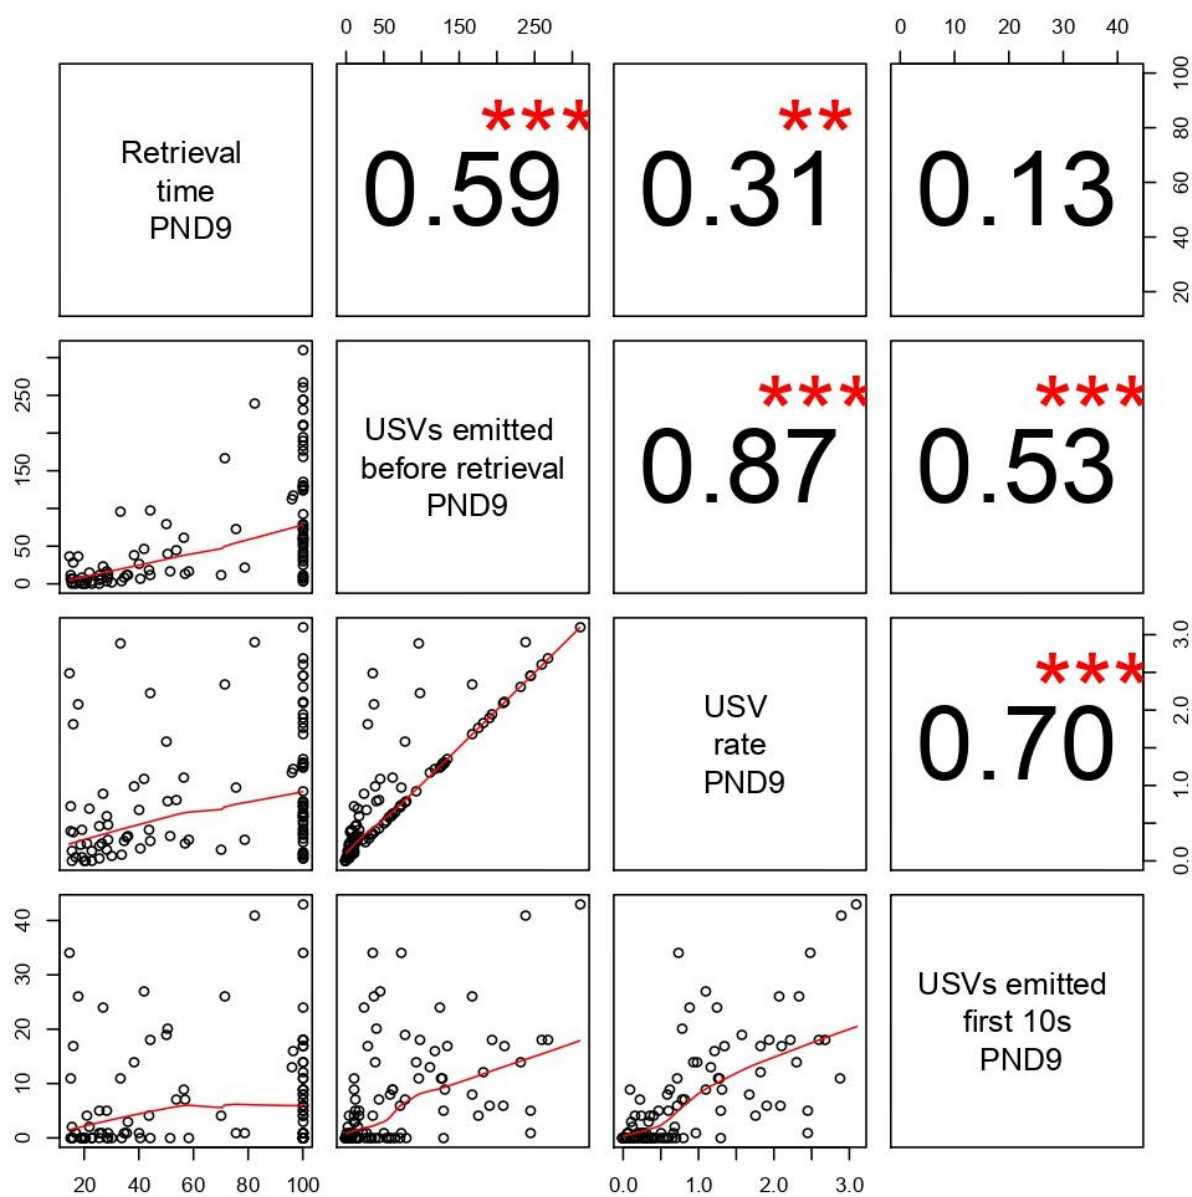

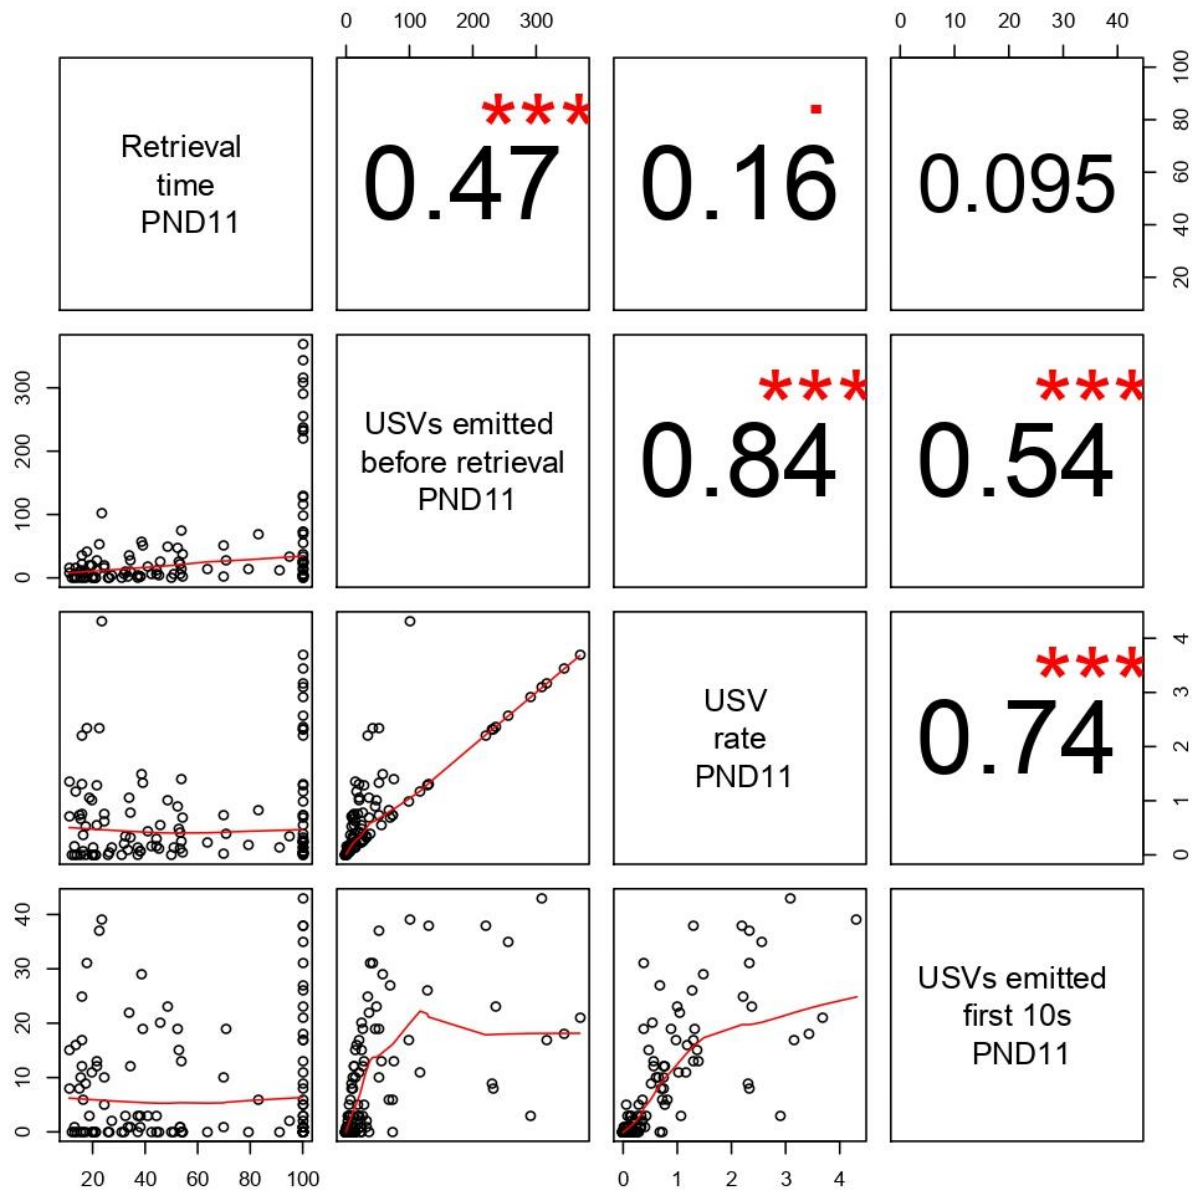

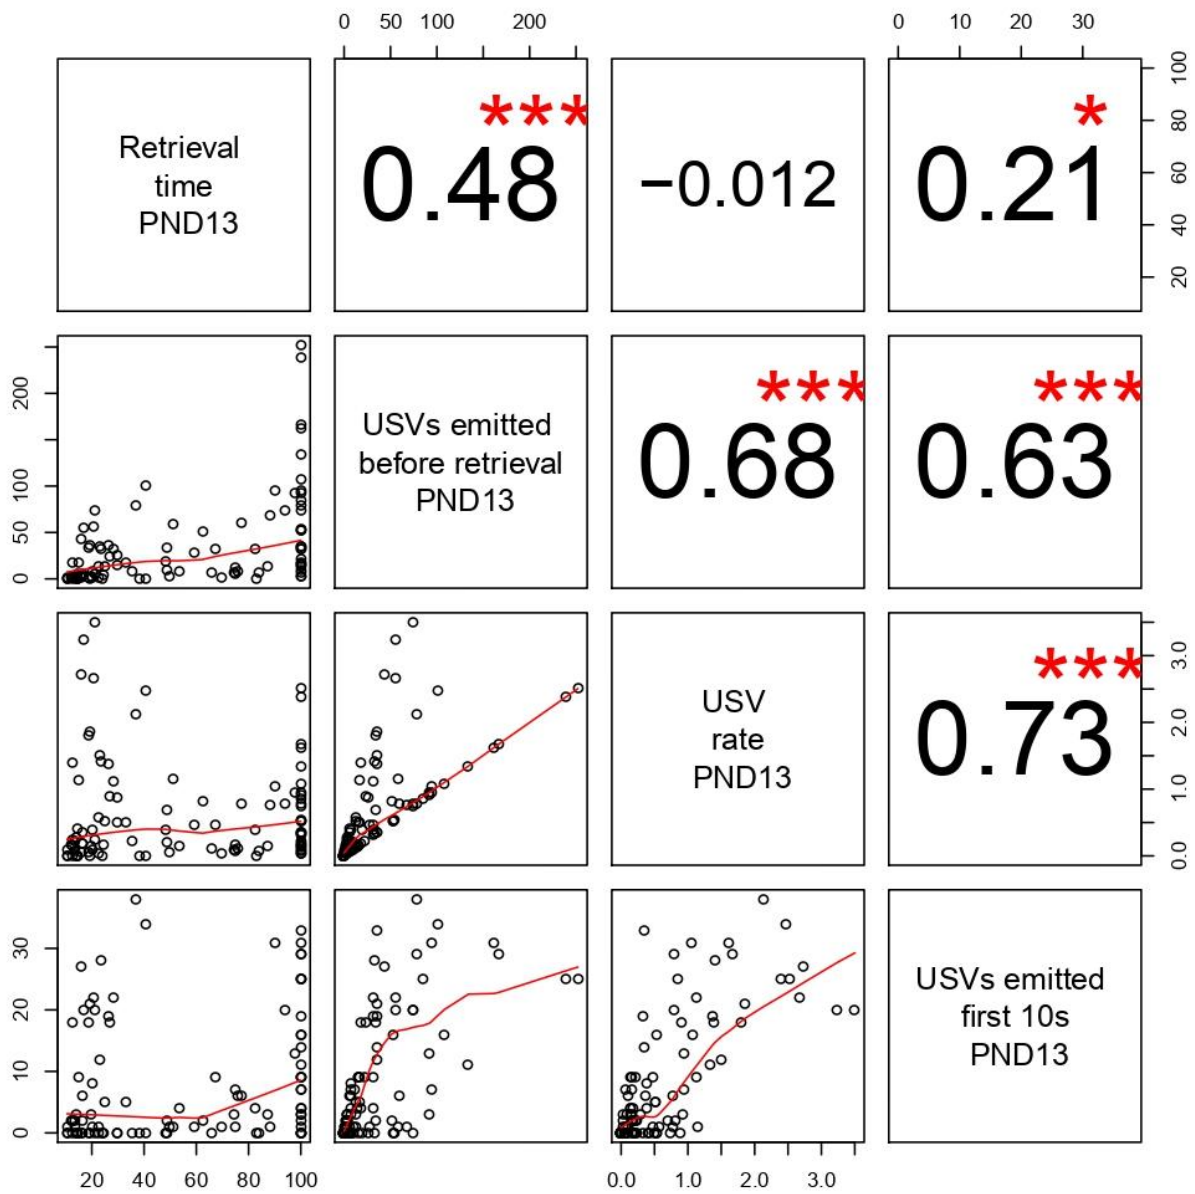

**Supplementary Figure 7.** Pairwise correlational plots of retrieval time (s), average USV duration (s) and sum of USV duration (s). Pairwise correlation plots are first given for all test days combined (PND5-13) and then separately for PND5, 7, 9, 11 and 13. Below diagonal the pairwise correlation plot is shown. Above the diagonal the estimated Pearson correlation coefficient is given with significance value. (°p<0.10; \*p<0.05; \*\*p<0.01; \*\*\*p<0.001)

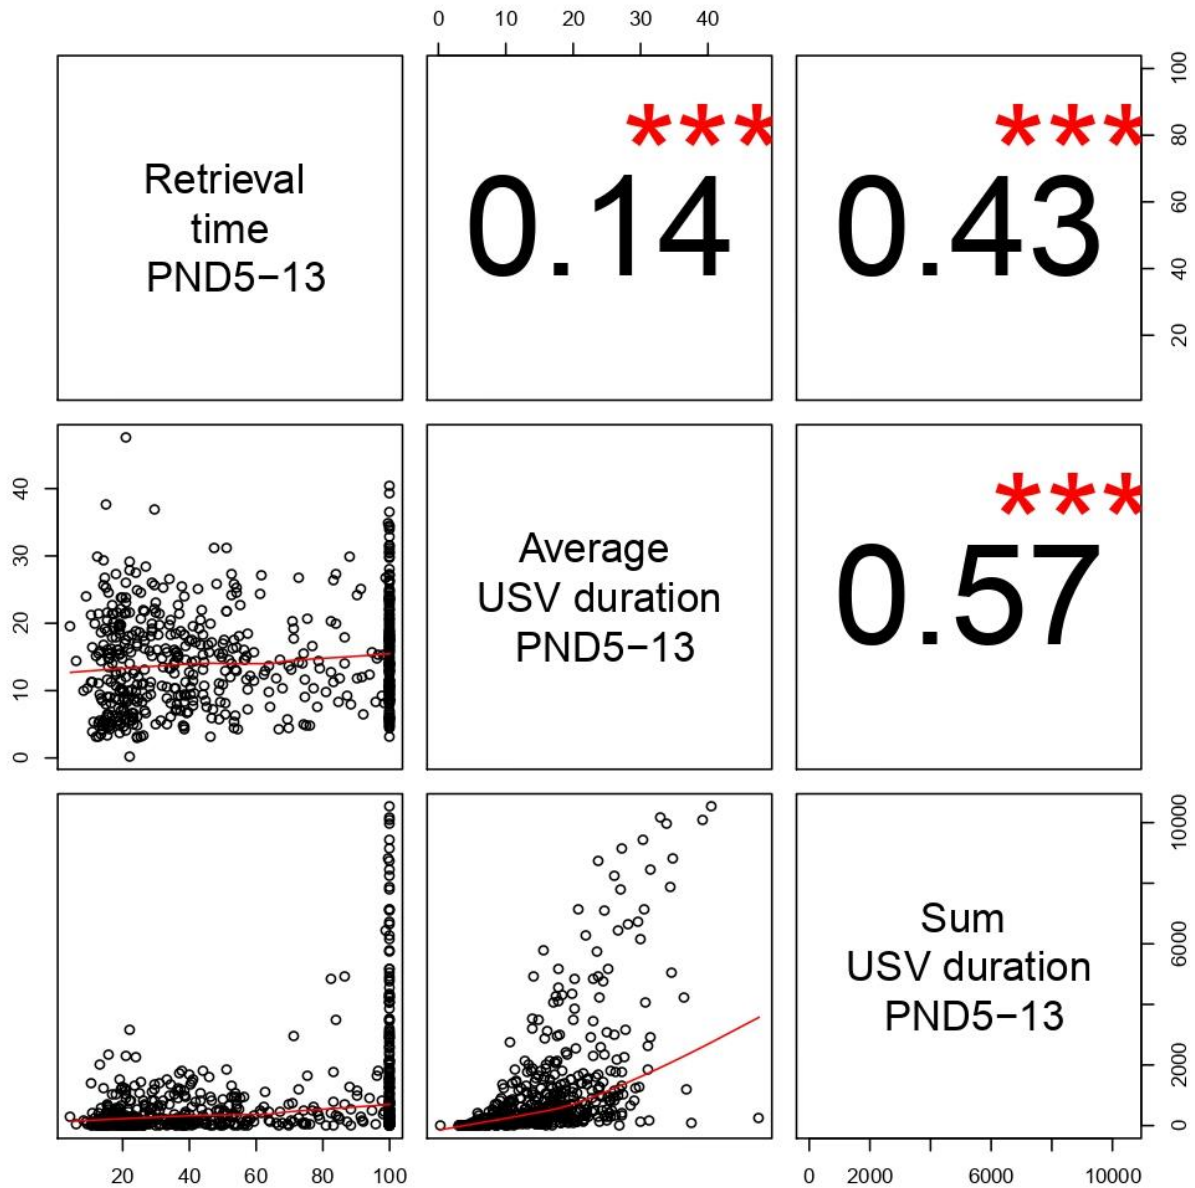

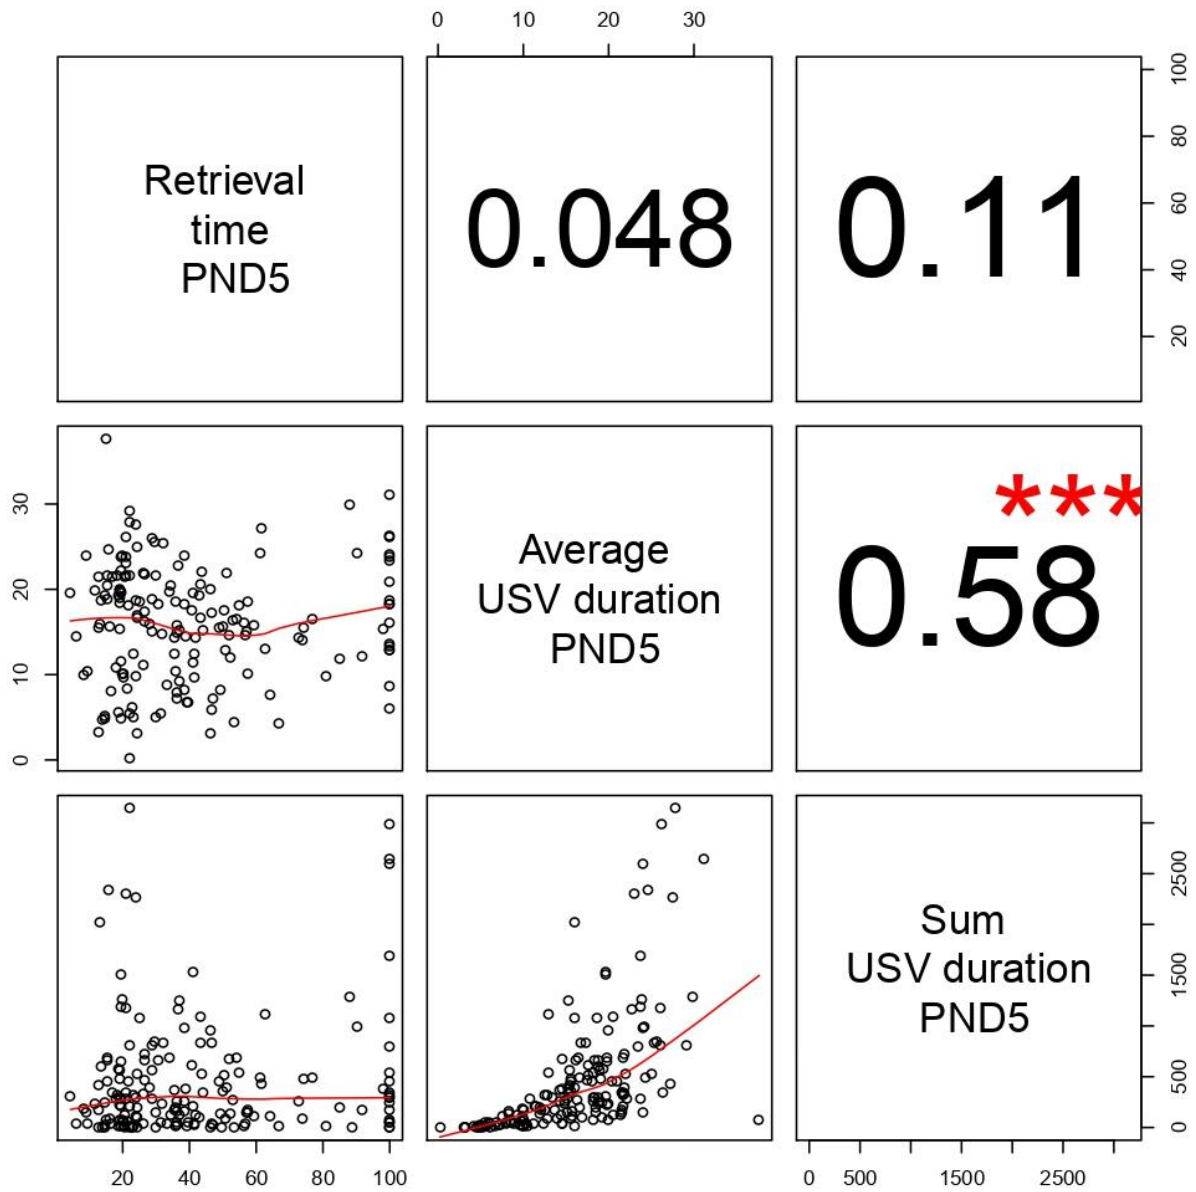

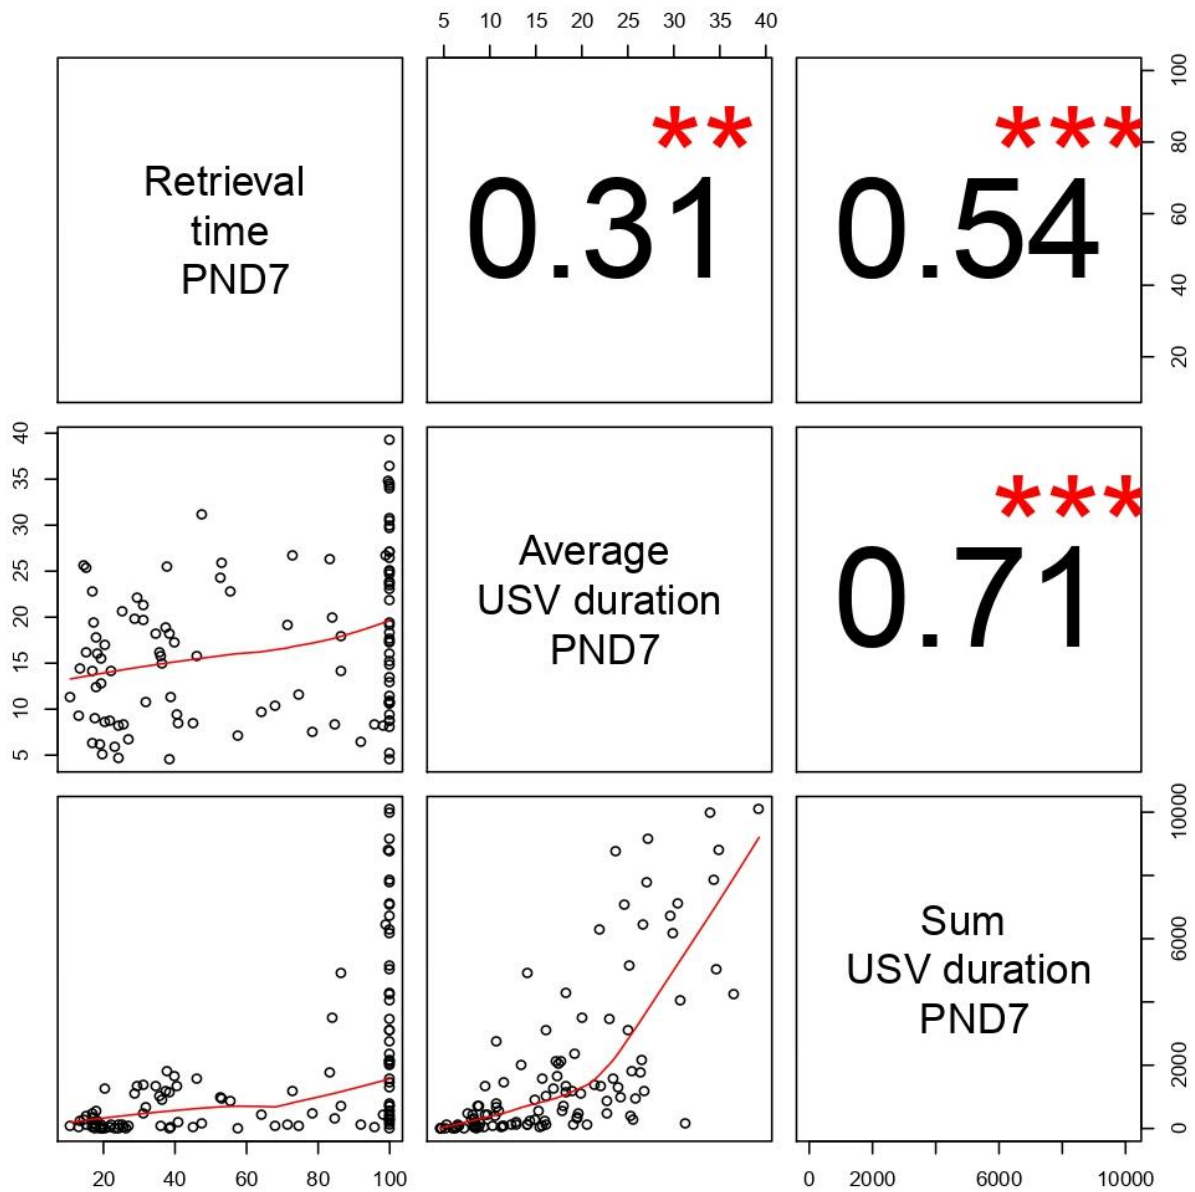



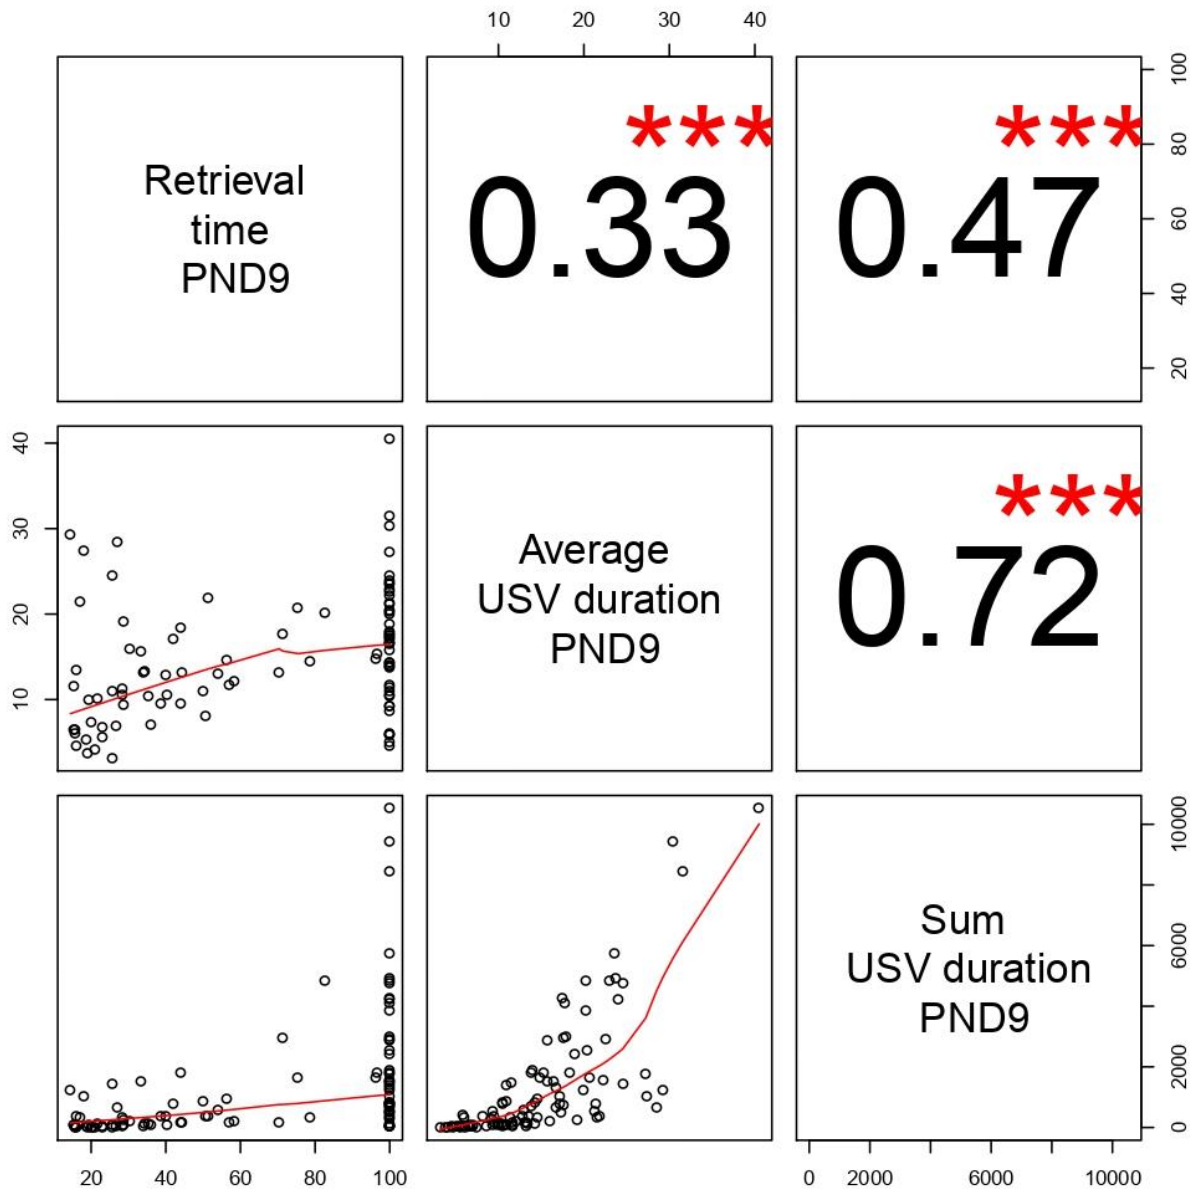



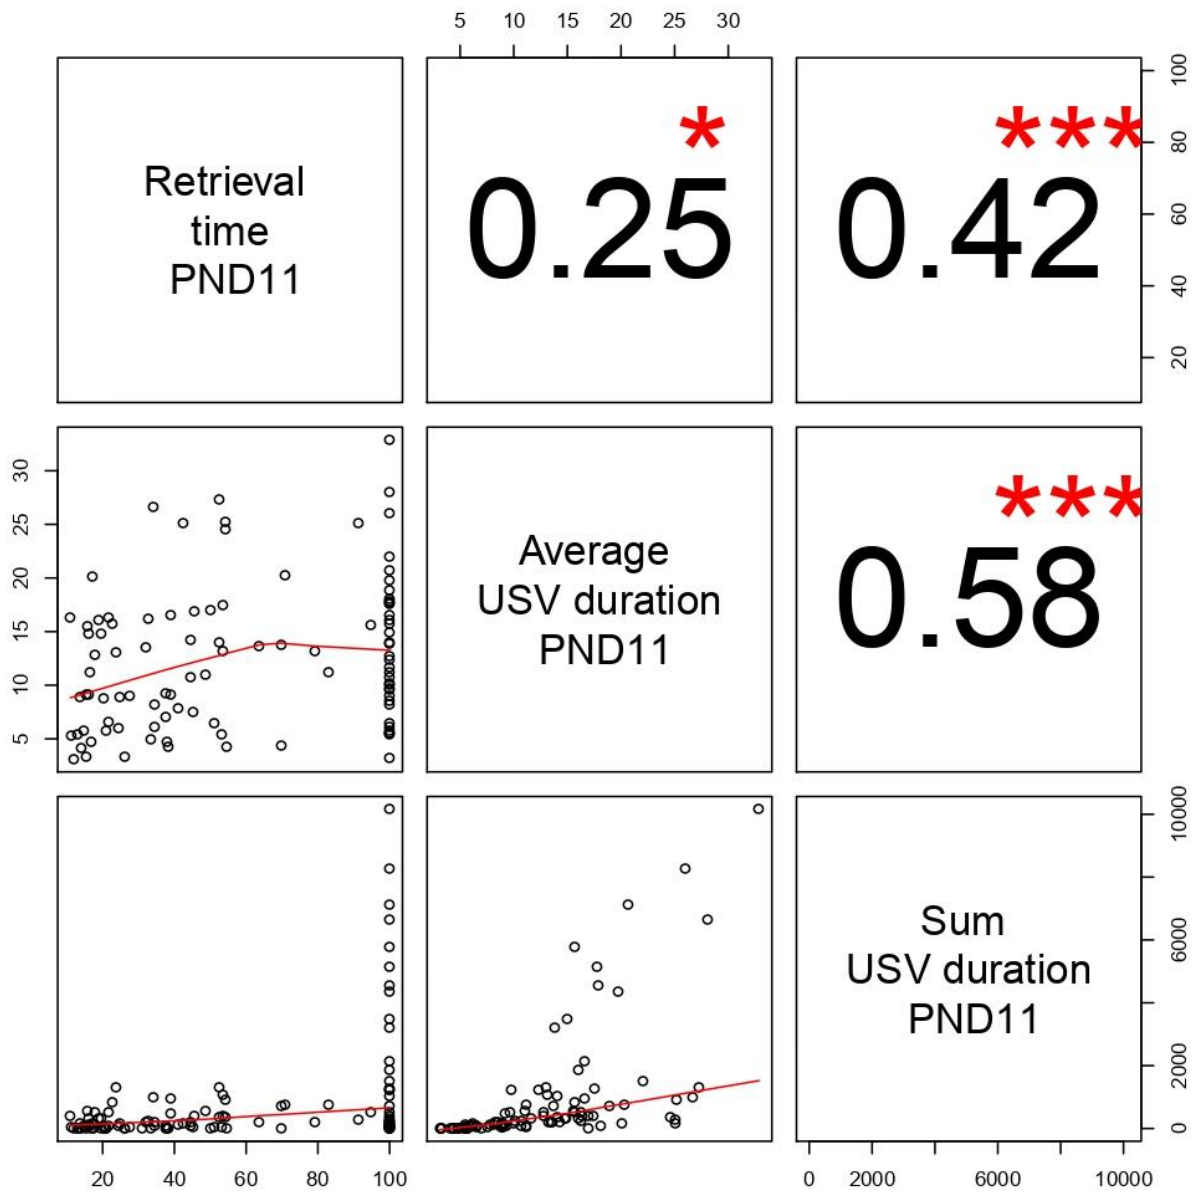

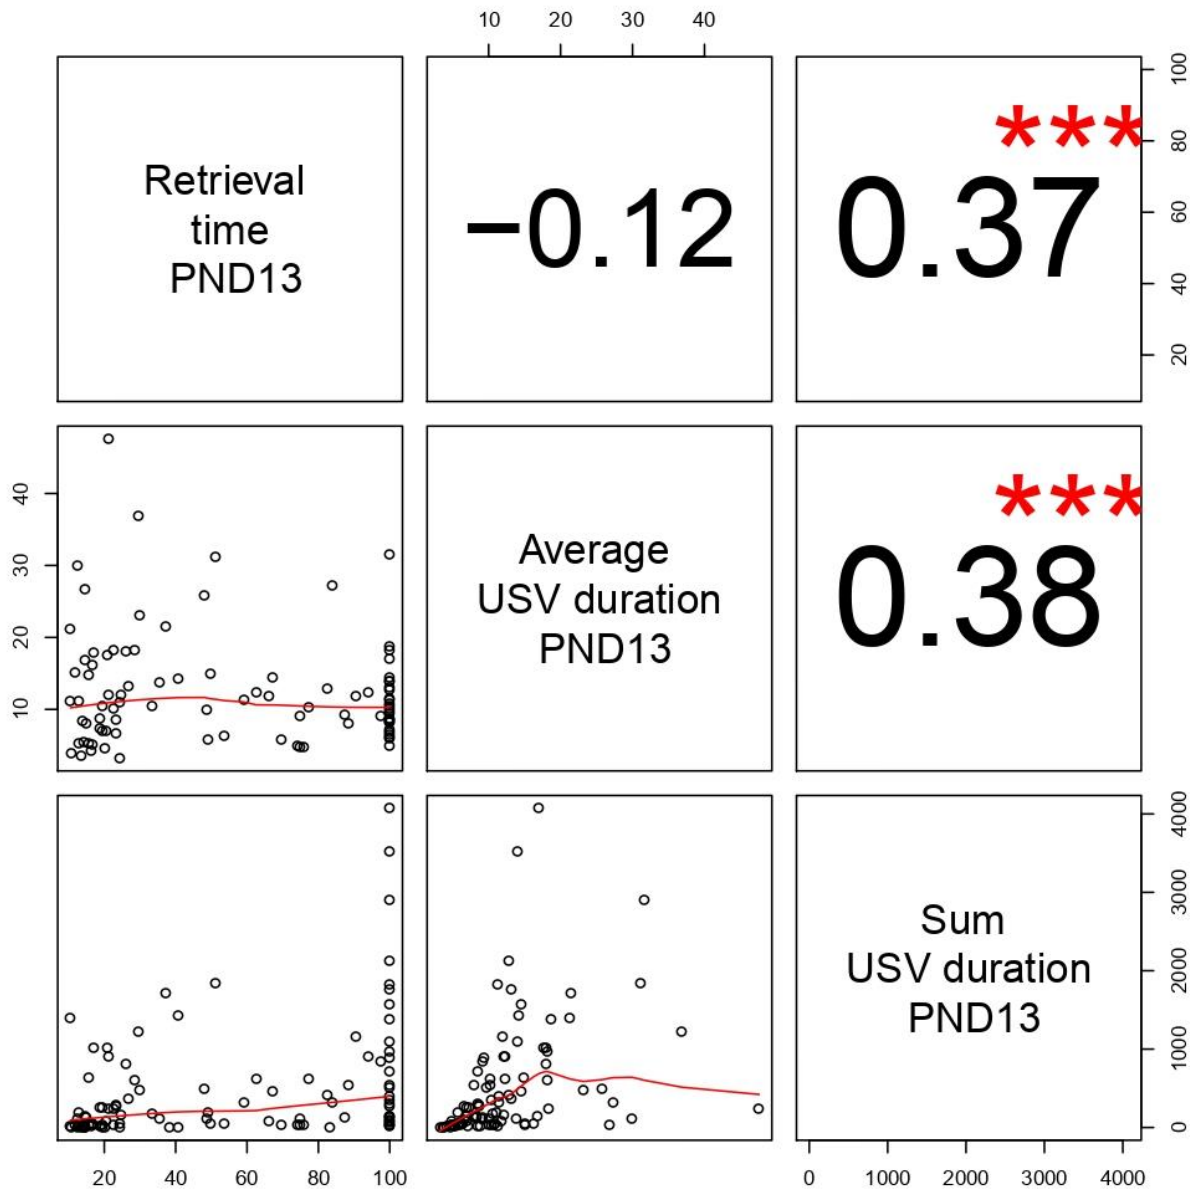

Supplement: Data_Sheet_1.PDF [file Data_Sheet_1.PDF]
